# Supplementary material for: Controlling the electronic transport through the carbon nanotube junction via the local electronic environment
Source: Royal Society of Chemistry journal article supplement (doi:10.1039/d4nj01256a), 2024-01-01
Supplement: d4nj01256a1.pdf [file d4nj01256a1.pdf]

## Supporting Information

### Controlling the electronic transport through the carbon nanotube junction by local electronic environment

Huaguo Xu, Jianwei Zhao, Liuyue Zhang, Lianmei Liu, Na Cheng\*, Yuanyuan  
He\*

*Key Laboratory of Yarn Materials Forming and Composite Processing Technology, Jiaying University, Jiaying  
314001, China*

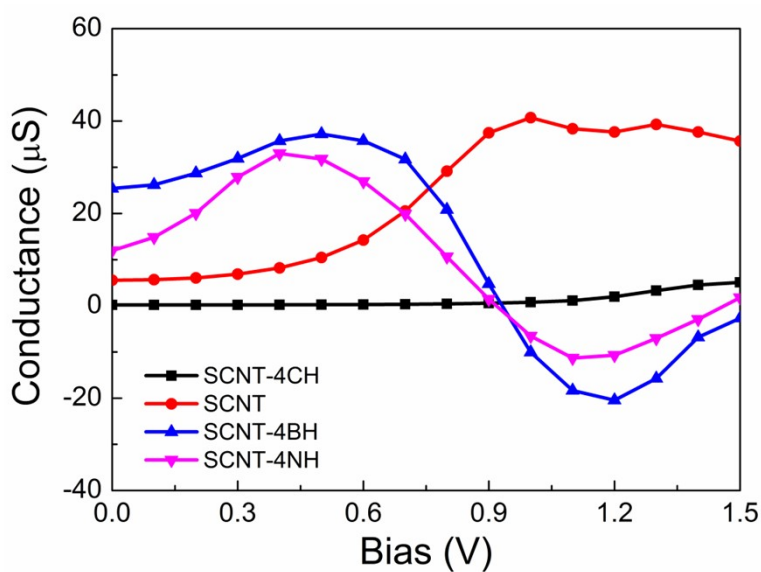

**Figure S1.** The conductance characteristics of SCNT-4CH, SCNT, SCNT-4BH and SCNT-4NH junctions.
